# Supplementary material
Source: ML conference proceedings conference paper supplement (https://openaccess.thecvf.com/content/ICCV2023/html/Yang_Generating_Visual_Scenes_ICCV_2023_paper.html)
Supplement: Supplementary file 1 [file Yang_Generating_Visual_Scenes_ICCV_2023_supplemental.pdf]

# Generating Visual Scenes from Touch

## – Supplementary Material –

We provide additional details about our method, and provide qualitative results for our generation tasks.

### A. Model Architecture and Implementation Details

We provide additional details about the latent diffusion model, such as the training hyperparameters.

Table 1: We show detailed hyperparameters setting of our models, including first stage model, condition model and LDM model.

| Hyperparameter       | Value              | Hyperparameter              | Value               |
|----------------------|--------------------|-----------------------------|---------------------|
| Learning Rate        | $2 \times 10^{-6}$ | LDM Model                   | U-Net               |
| Image Size           | 256                | LDM Input Size              | 64                  |
| Channel              | 3                  | LDM Input Channel           | 3                   |
| Conditioning Key     | Crossattn          | LDM Output Channel          | 3                   |
| First Stage Model    | VQModelInterface   | LDM Attention Resolutions   | [8,4,2]             |
| VQ In-channel        | 3                  | LDM Num Resblocks           | 2                   |
| VQ Out-channel       | 3                  | LDM Channel Mult            | [1,2,3,5]           |
| VQ Num. Resblocks    | 2                  | LDM Num Head Channels       | 32                  |
| VQ dropout           | 0.0                | LDM Use Spatial Transformer | True                |
| Condition Model      | CVTP ResNet-18     | LDM Transformer Depth       | 1                   |
| Condition Layer      | 5                  | LDM Context Dim             | 512                 |
| Condition Frame      | 5                  | Batch Size                  | 48                  |
| Cond Stage Trainable | True               | Monitor                     | val/loss_simple_ema |
| Diffusion Timesteps  | 1000               | Epoch                       | 30                  |
| Scheduler            | DDPM               |                             |                     |

## B. More Qualitative Results

We provide additional results visuo-tactile cross generation, tactile-driven stylization and tactile-driven shading estimation.

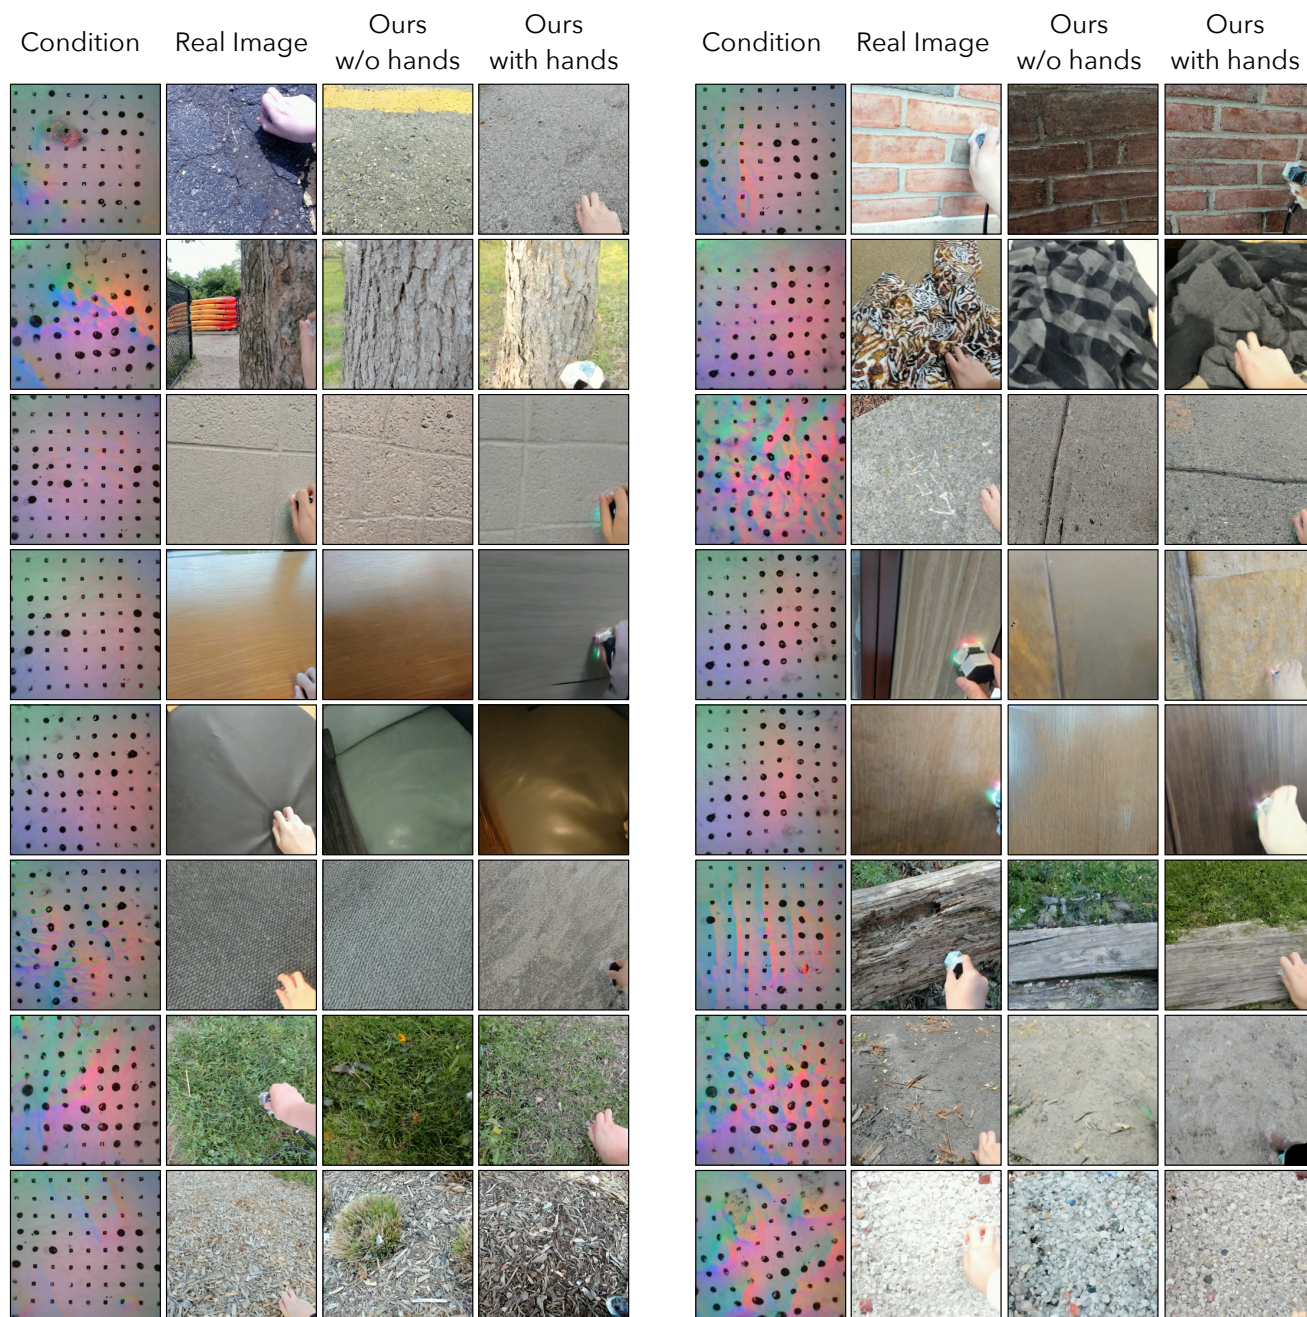

Figure 1: Additional results for **touch-to-image generation** on *Touch and Go* dataset, where we show both our results with and without sensors.

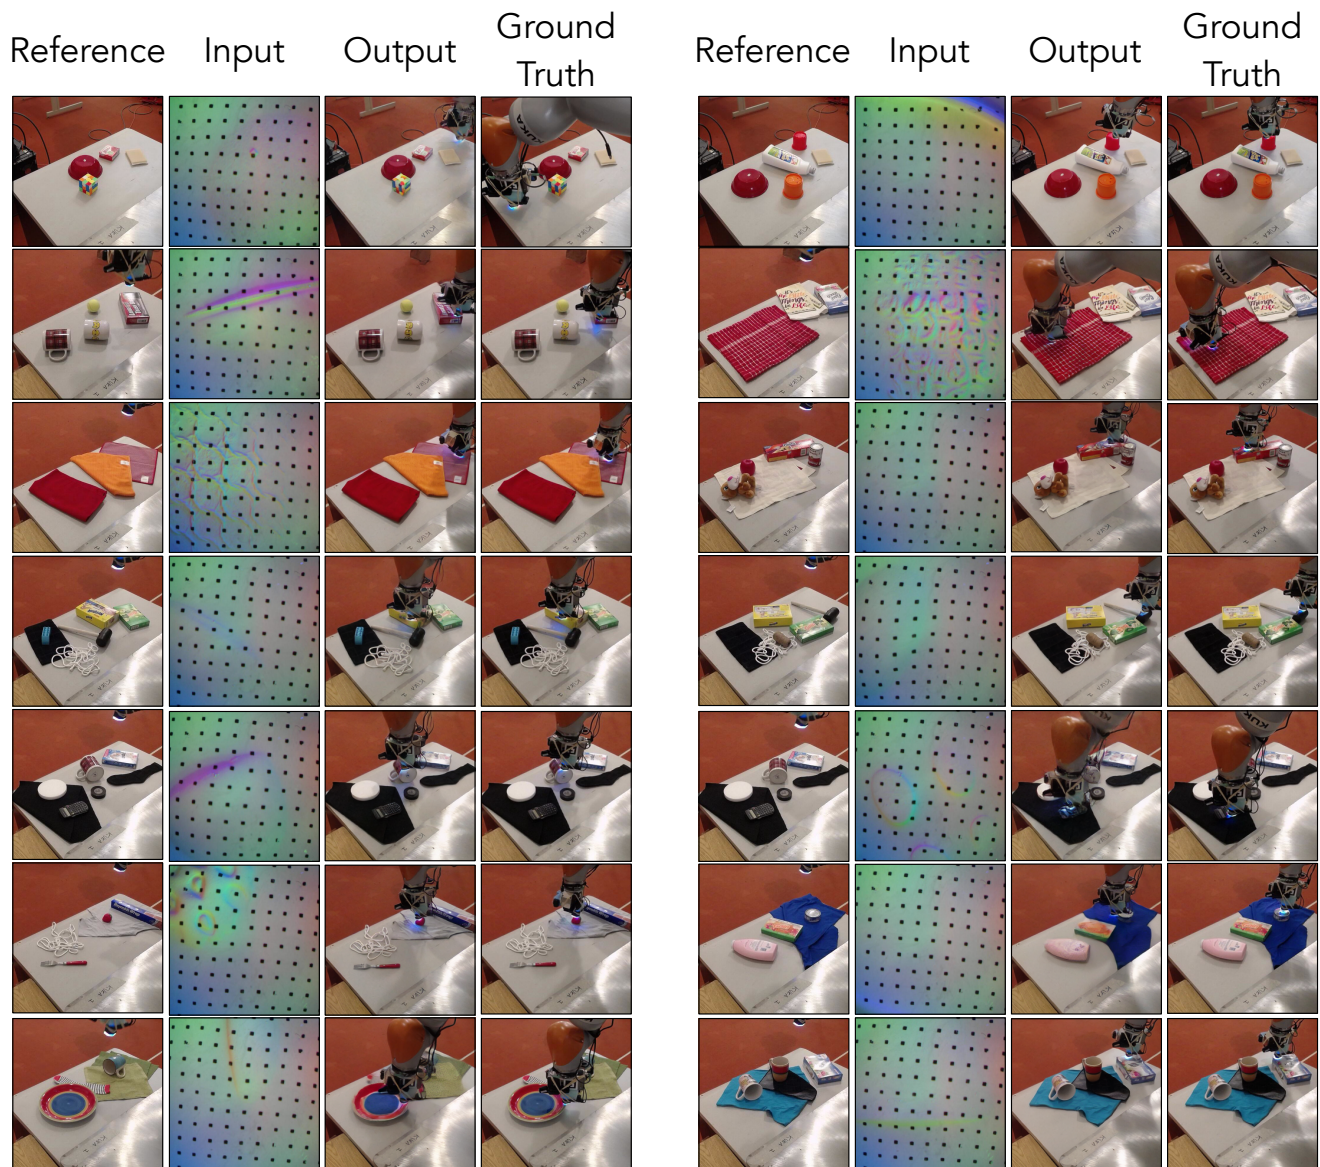

Figure 2: Additional results for **touch-to-image generation** on *VisGel* dataset.

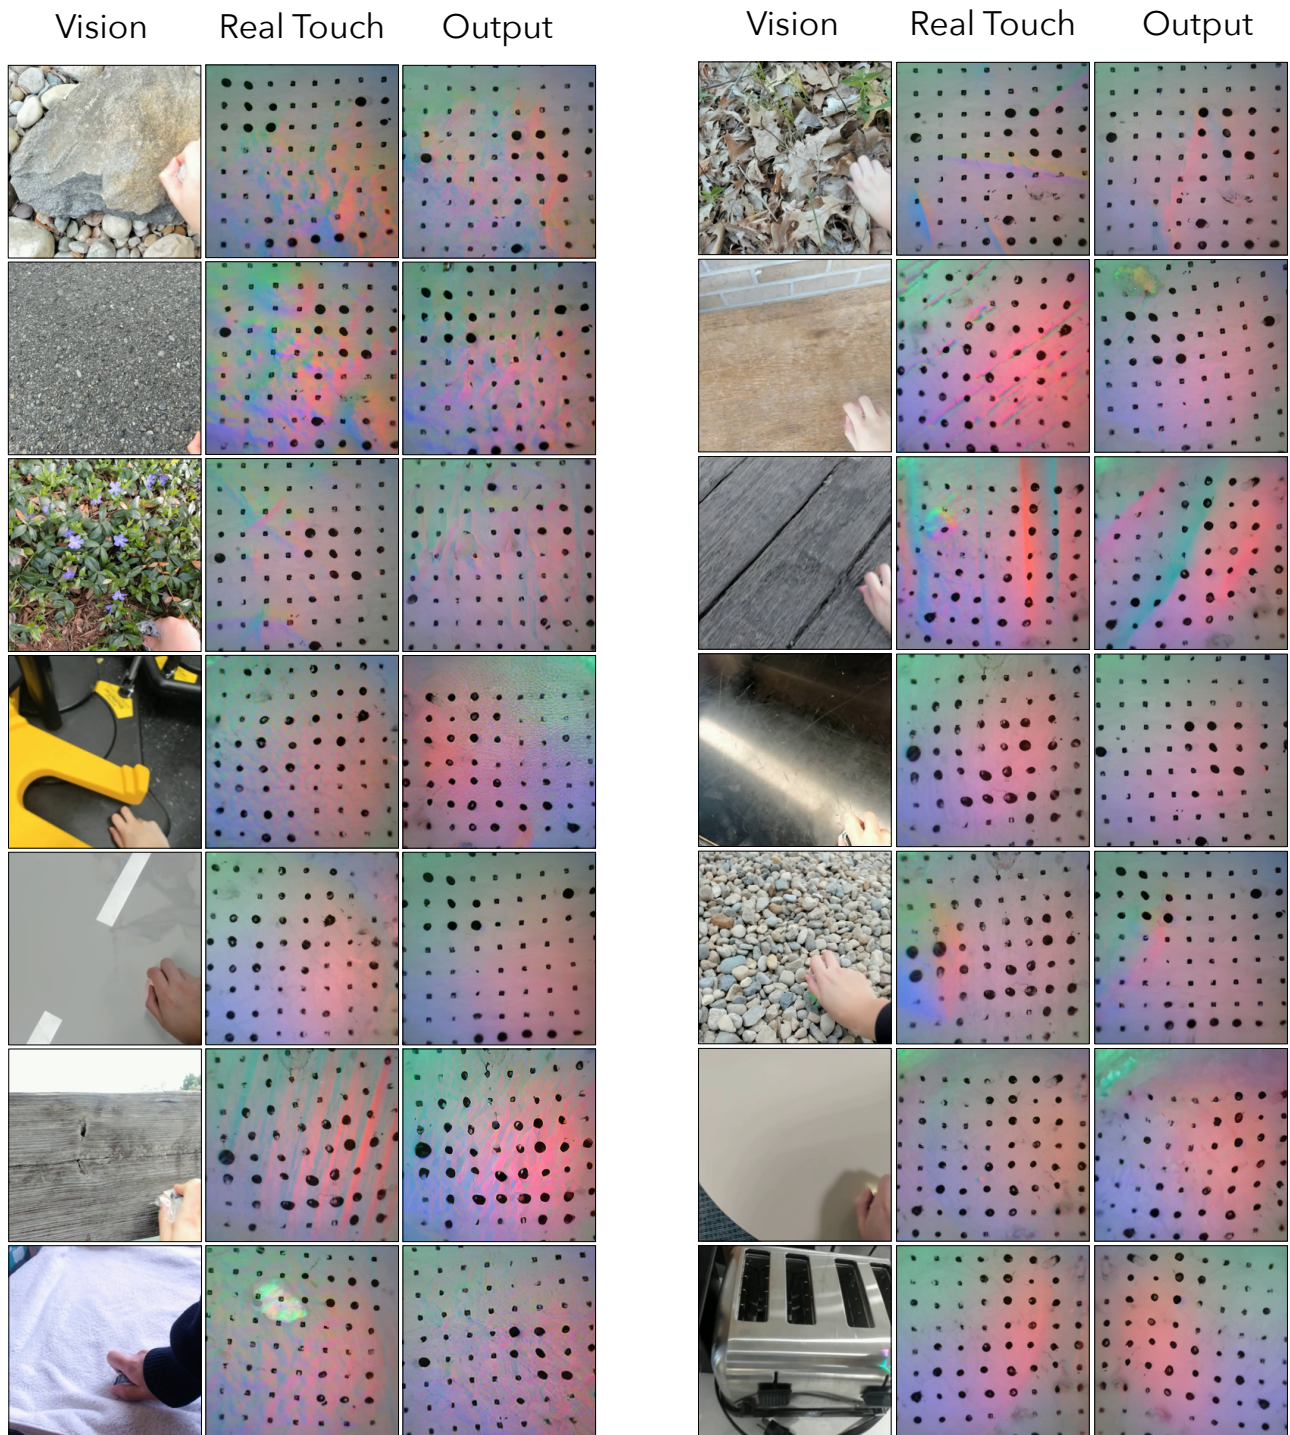

Figure 3: Additional results for **image-to-touch generation** on *Touch and Go* dataset.

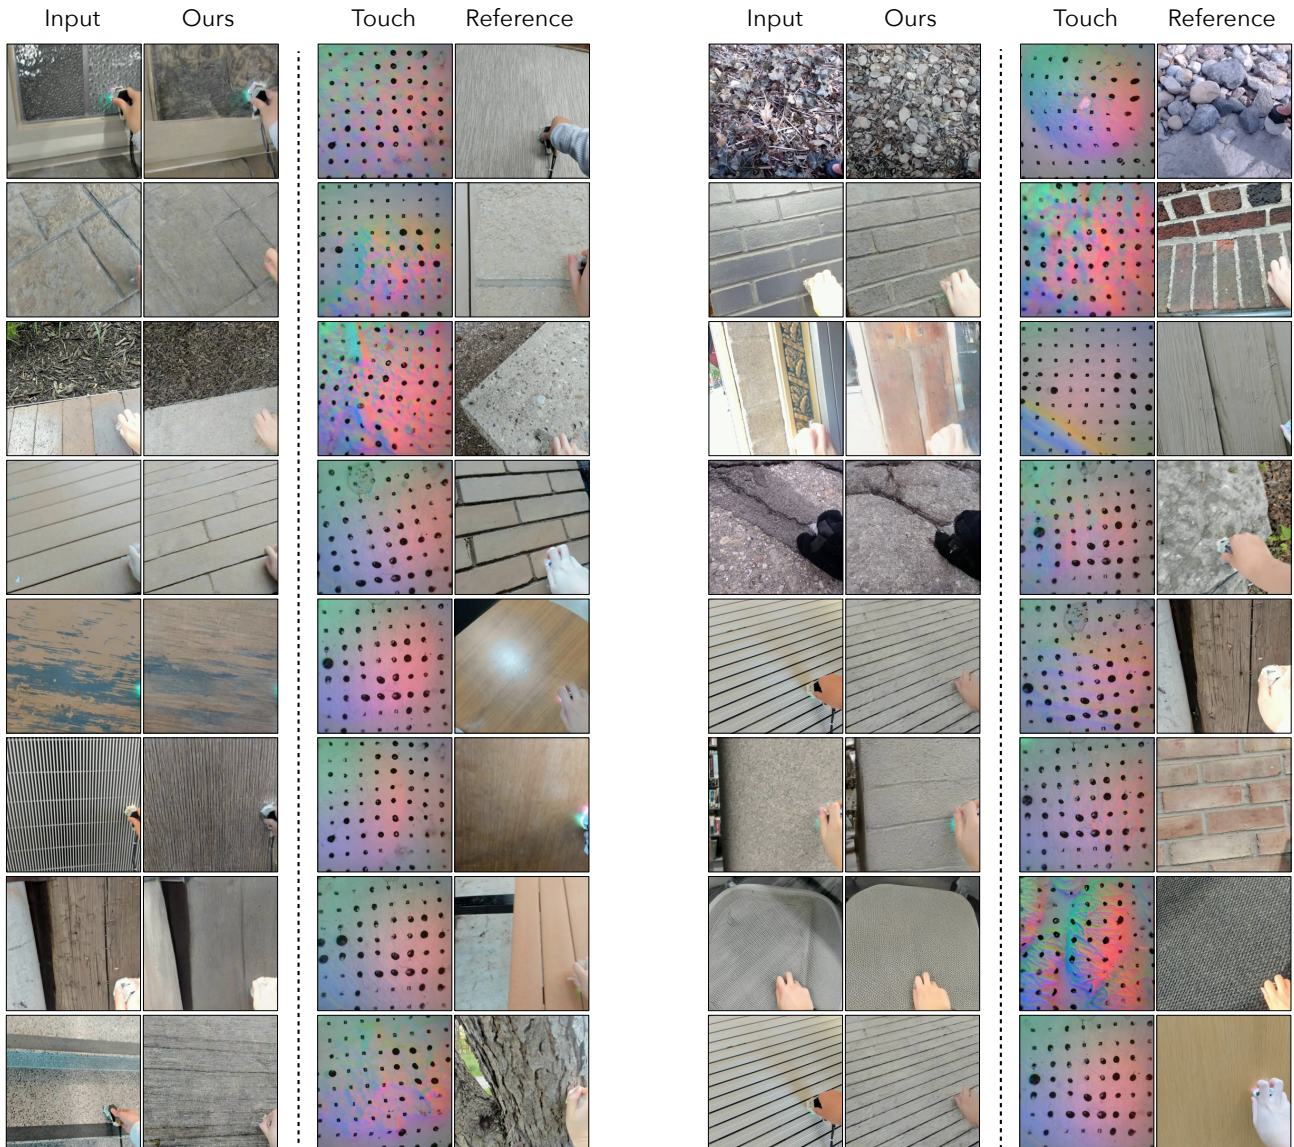

Figure 4: Additional results for **tactile-driven image stylization** results. (*Zoom in for better viewing*)

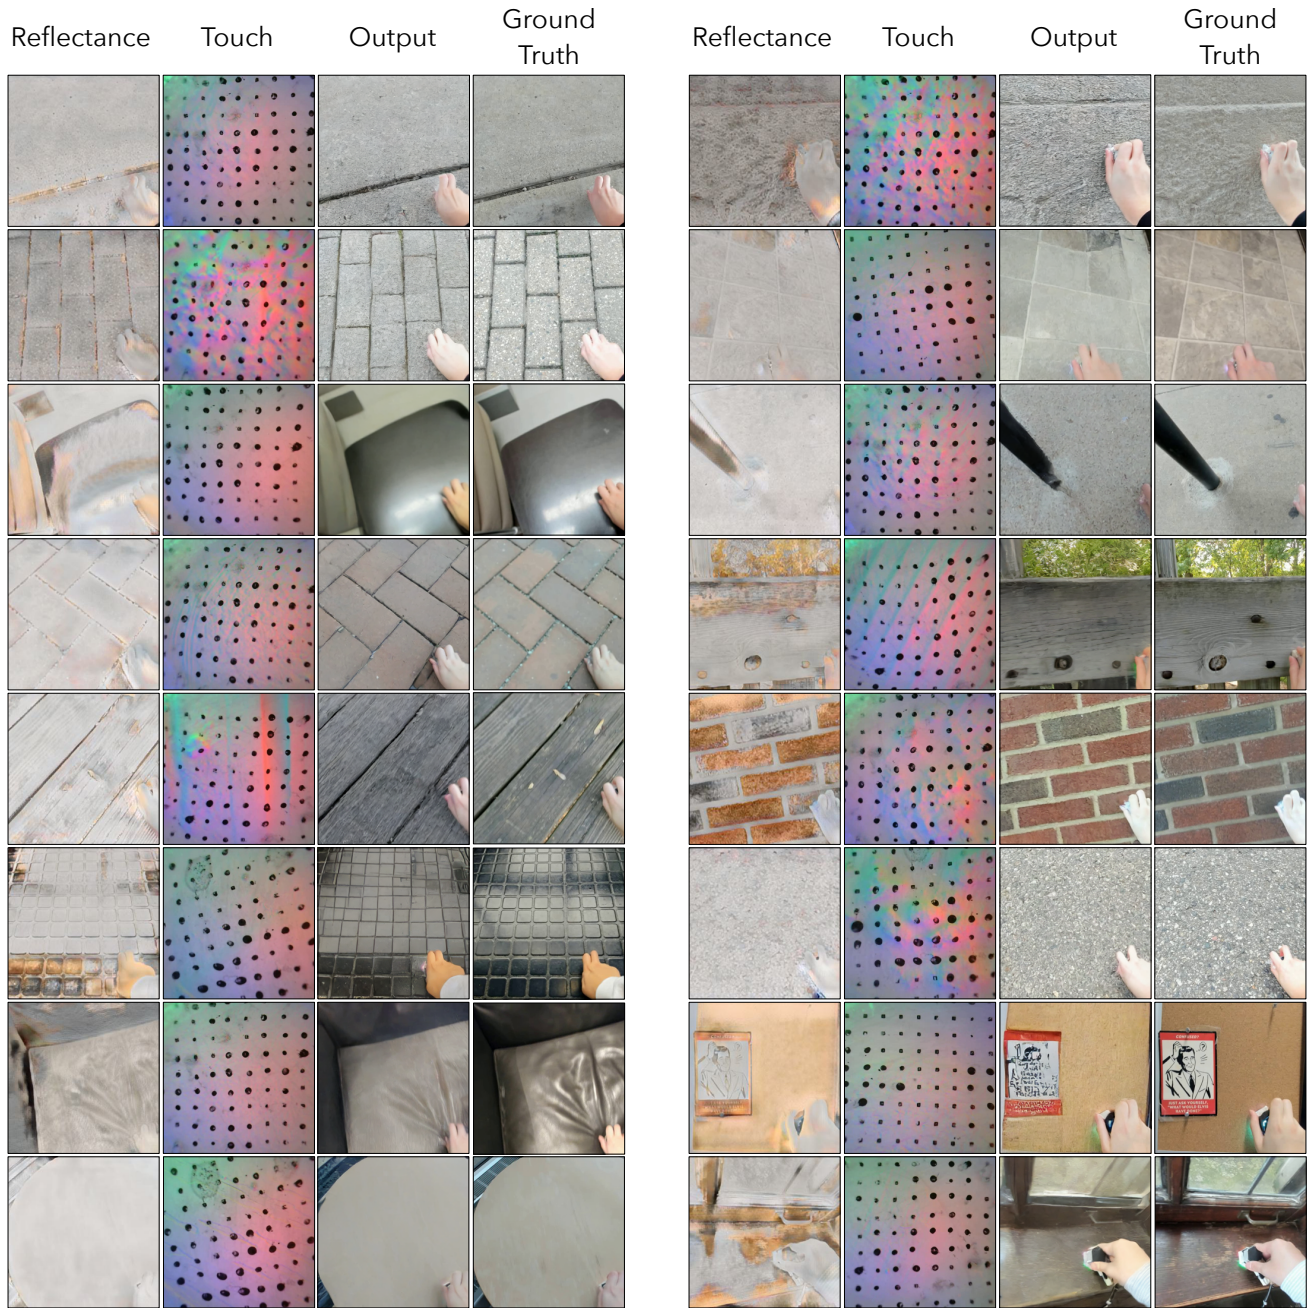

Figure 5: Additional results for tactile-driven shading estimation. (Zoom in for better viewing)
